# Supplementary material
Source: PubMed Central journal article supplement (PMC3676144)
Supplement: JVI.00764-13_zjv999097759so5.pdf [file JVI.00764-13_zjv999097759so5.pdf]

## **Supplemental Data**

### **Differing effects of Herpes Simplex Virus 1 and Pseudorabies Virus infection on centrosomal function**

David Padeloup, Marc Labetoulle and Frazer J. Rixon

#### **Supplemental Legends**

**Supplemental Movie S1.** Dynamics of MTs plus-ends in a mock-infected cell. HFFF2 cells were transfected with pGFP-hEB3 to mark MTs plus-ends. 16h later, EB3 fluorescence was monitored at 37°C at a rate of 1 frame every 2 seconds for 120 seconds. The movie is shown at 10 frames/second. Frame is 73  $\mu\text{m}$  by 55  $\mu\text{m}$ .

**Supplemental Movie S2.** Dynamics of MTs plus-ends in a vUL35RFP1D1 infected cell. HFFF2 cells were transfected with pGFP-hEB3 to mark MTs plus-ends. 6h later, they were infected with 1 pfu/cell of vUL35RFP1D1. Infected cells were identified through nuclear VP26RFP fluorescence (not shown). GFP-EB3 fluorescence was monitored 12h later at 37°C at a rate of 1 frame every 2 seconds for 120 seconds. The movie is shown at 10 frames/second. Frame is 127  $\mu\text{m}$  by 74  $\mu\text{m}$ .

**Supplemental Movie S3.** Dynamics of MTs plus-ends in a mock-infected cell. PK15 cells were transfected with pGFP-hEB3 to mark MTs plus-ends. 12h later, EB3 fluorescence was monitored at 37°C at a rate of 1 frame every 2 seconds for 120 seconds. The movie is shown at 10 frames/second. Frame is 106  $\mu\text{m}$  by 70  $\mu\text{m}$ .

**Supplemental Movie S4.** Dynamics of MTs plus-ends in a PrV infected cell. PK15 cells were transfected with pGFP-hEB3 to mark MTs plus-ends. 6h later, they were infected with 1

pfu/cell of PrV. Infected cells were subsequently identified by immunostaining using an antibody directed against capsids (not shown). GFP-EB3 fluorescence was monitored 12h after infection at 37°C at a rate of 1 frame every 2 seconds for 120 seconds. The movie is shown at 10 frames/second. Frame is 95  $\mu\text{m}$  by 89  $\mu\text{m}$ .
